# Supplementary material
Source: ML conference proceedings conference paper supplement (https://proceedings.mlr.press/v216/zou23a.html)
Supplement: Supplementary file 1 [file zou23a-supp.pdf]

---

# Supplementary Material for MixupE

---

Yingtian Zou<sup>1</sup>    Vikas Verma<sup>2,3</sup>    Sarthak Mittal<sup>2</sup>    Wai Hoh Tang<sup>1</sup>    Hieu Pham<sup>4</sup>    Juho Kannala<sup>3</sup>  
Yoshua Bengio<sup>2</sup>    Arno Solin<sup>3</sup>    Kenji Kawaguchi<sup>1</sup>

<sup>1</sup>National University of Singapore, Singapore

<sup>2</sup>Universite de Montreal, Mila, Canada

<sup>3</sup>Aalto University, Finland

<sup>4</sup>Google Brain, USA

## A NOTATIONS

We denote by  $z = (\mathbf{x}, \mathbf{y})$  the input and output pair where  $\mathbf{x} \in \mathcal{X} \subseteq \mathbb{R}^d$  and  $\mathbf{y} \in \mathcal{Y} \subseteq \mathbb{R}^C$ . Let  $f_\theta(\mathbf{x}) \in \mathbb{R}^C$  be the output of the logits (i.e., the last layer before the softmax or sigmoid) of the model parameterized by  $\theta$ . We use  $\ell(\theta, \mathbf{z}) = h(f_\theta(\mathbf{x})) - \mathbf{y}^\top f_\theta(\mathbf{x})$  to denote the loss function. Let  $g(\cdot)$  be the activation function. We use  $\mathbf{x}_{(i)}$  to index  $i$ -th element of the vector  $\mathbf{x}$  and  $\mathbf{x}_j$  to represent  $j$ -th variable in a set. The notation list is:

- $S = \{\mathbf{x}_i, \mathbf{y}_i\}_{i \in [n]}$  is the fixed training set while  $\mathbf{x}'$  is the random test sample.
- $\ell$  is the loss function for any data point.
- $L_n^{\text{mix}}(\theta, S)$ : empirical risk of Mixup of size  $n$  with parameters  $\theta$ .
- $\mathcal{L}$ : empirical risk of *MixupE*.
- $\Theta$ : the constraint set of parameters  $\theta$ .
- $\mathcal{R}(\Theta, S)$ : Empirical Rademacher complexity of set  $\Theta$  over training set  $S$ .
- $\mathbf{J}_a(b)$ : Jacobian matrix of  $a$  w.r.t  $b$ .

## B PROOF OF THEOREM 1

*Proof.* For the cross-entropy loss, we have

$$\ell(\theta, (\mathbf{x}, \mathbf{y})) = -\log \frac{\exp(\mathbf{y}^\top f_\theta(\mathbf{x}))}{\sum_j \exp(f_\theta(\mathbf{x})_{(j)})} = \log \left( \sum_j \exp(f_\theta(\mathbf{x})_{(j)}) \right) - \mathbf{y}^\top f_\theta(\mathbf{x}) \quad (1)$$

where  $\mathbf{y} \in \mathbb{R}^C$  is a one-hot vector. For the logistic loss,

$$\ell(\theta, (\mathbf{x}, \mathbf{y})) = -\log \frac{\exp(\mathbf{y} f_\theta(\mathbf{x}))}{1 + \exp(f_\theta(\mathbf{x}))} = \log(1 + \exp(f_\theta(\mathbf{x})) - \mathbf{y} f_\theta(\mathbf{x})). \quad (2)$$

Thus, for both cases, we can write

$$\ell(\theta, (\mathbf{x}, \mathbf{y})) = h(f_\theta(\mathbf{x})) - \mathbf{y}^\top f_\theta(\mathbf{x}) \quad (3)$$

where  $h(\mathbf{z}) = \log \left( \sum_j \exp(\mathbf{z}_j) \right)$  for the cross-entropy loss and  $h(\mathbf{z}) = \log(1 + \exp(\mathbf{z}))$  for the logistic loss. Using this and equation (9) of [Zhang et al., 2021], we have that

$$L_n^{\text{mix}}(\theta, S) = \frac{1}{n} \sum_{i=1}^n \mathbb{E}_{\lambda \sim \mathcal{D}_\lambda} \mathbb{E}_{\mathbf{x}' \sim \mathcal{D}_X} \ell(\theta, (r_i(\mathbf{x}'), \mathbf{y}_i)),$$

where  $\mathcal{D}_X$  is the empirical distribution induced by training samples, and

$$r_i(\mathbf{x}) = \lambda \mathbf{x}_i + (1 - \lambda) \mathbf{x}. \quad (4)$$

Define  $a_\lambda = 1 - \lambda$ . Then,

$$r_i(\mathbf{x}') = (1 - a_\lambda) \mathbf{x}_i + a_\lambda \mathbf{x}' = \mathbf{x}_i + a_\lambda (\mathbf{x}' - \mathbf{x}_i). \quad (5)$$

Define

$$\varphi_i(a_\lambda) := f_\theta(\mathbf{x}_i + a_\lambda (\mathbf{x}' - \mathbf{x}_i)) \quad (6)$$

Assume  $f_\theta$  lies in the  $C^K$  manifold ( $K$ -times differentiable), then there exists a function  $\psi_i$  such that  $\lim_{a_\lambda \rightarrow 0} \psi_i(a_\lambda) = 0$  and with Taylor expansion at  $a_\lambda = 0$ , we have

$$\begin{aligned} \varphi_i(a_\lambda) &= \varphi_i(0) + \sum_{k=1}^K \frac{a_\lambda^k}{k!} \varphi_i^{(k)}(0) + a_\lambda^K \psi_i(a_\lambda) \\ &= f_\theta(\mathbf{x}_i) + \sum_{k=1}^K \frac{a_\lambda^k}{k!} \varphi_i^{(k)}(0) + a_\lambda^K \psi_i(a_\lambda) \end{aligned} \quad (7)$$

where  $\varphi_i^{(k)}(0)$  is the  $k$ -th order derivative at  $a_\lambda = 0$ ,  $\psi_i(a_\lambda)$  is the remainder term:

$$\psi_i(a_\lambda) = \int_{\mathbb{R}} \varphi_i^{(K)}(a_\lambda) da_\lambda - \frac{1}{k!} \varphi_i^{(K)}(0) \quad (8)$$

Here, for any  $k \in \mathbb{N}^+$ , we have

$$\begin{aligned} \varphi_i^{(k)}(0) &= \varphi_i^{(k)}(a_\lambda)|_{a_\lambda=0} = \frac{\partial^k f_\theta(\mathbf{x}_i + a_\lambda (\mathbf{x}' - \mathbf{x}_i))}{\partial (\mathbf{x}_i + a_\lambda (\mathbf{x}' - \mathbf{x}_i))^k} (\mathbf{x}' - \mathbf{x}_i)^{\otimes k} \Big|_{a_\lambda=0} \\ &= \frac{\partial^k f_\theta(\mathbf{x}_i)}{\partial (\mathbf{x}_i)^k} (\mathbf{x}' - \mathbf{x}_i)^{\otimes k} \end{aligned} \quad (9)$$

where  $\otimes$  denotes Kronecker product and thus  $(\mathbf{x}' - \mathbf{x}_i)^{\otimes k} \in \mathbb{R}^{d^k}$ . We can then rewrite  $\varphi_i^{(k)}(0)$  as

$$\varphi_i^{(k)}(0) = \mathbf{J}_{f_\theta}^k(\mathbf{x}_i) (\mathbf{x}' - \mathbf{x}_i)^{\otimes k} \quad (10)$$

Plug back into the (7), we have

$$\begin{aligned} f_\theta(\mathbf{x}_i + a_\lambda (\mathbf{x}' - \mathbf{x}_i)) &= f_\theta(\mathbf{x}_i) + \sum_{k=1}^K \frac{a_\lambda^k}{k!} \mathbf{J}_{f_\theta}^k(\mathbf{x}_i) (\mathbf{x}' - \mathbf{x}_i)^{\otimes k} + a_\lambda^K \psi_i(a_\lambda) \\ &= f_\theta(\mathbf{x}_i) + a_\lambda \underbrace{\left( \sum_{k=1}^K \frac{a_\lambda^{k-1}}{k!} \mathbf{J}_{f_\theta}^k(\mathbf{x}_i) (\mathbf{x}' - \mathbf{x}_i)^{\otimes k} + a_\lambda^{K-1} \psi_i(a_\lambda) \right)}_{\Delta_i} \end{aligned} \quad (11)$$

Above equation will be

$$\begin{aligned} \ell(\theta, (r_i(\mathbf{x}), \mathbf{y}_i)) &= \ell[\theta, (\mathbf{x}_i + a_\lambda (\mathbf{x}' - \mathbf{x}_i), \mathbf{y}_i)] \\ &= h(f_\theta(\mathbf{x}_i + a_\lambda (\mathbf{x}' - \mathbf{x}_i))) - \mathbf{y}_i^\top f_\theta(\mathbf{x}_i + a_\lambda (\mathbf{x}' - \mathbf{x}_i)) \\ &= h(f_\theta(\mathbf{x}_i) + a_\lambda \Delta_i) - \mathbf{y}_i^\top (f_\theta(\mathbf{x}_i) + a_\lambda \Delta_i). \end{aligned} \quad (12)$$

Analogously, we can define  $\hat{\varphi}_i^{(k)}(a_\lambda) := h(f_\theta(\mathbf{x}_i) + a_\lambda \Delta_i)$  and the parallel notation  $\hat{\psi}_i(a_\lambda)$ , then

$$h(f_\theta(\mathbf{x}_i) + a_\lambda \Delta_i) = h(f_\theta(\mathbf{x}_i)) + \sum_{k=1}^K \frac{a_\lambda^k}{k!} \mathbf{J}_{h \circ f_\theta}^k(\mathbf{x}_i) \Delta_i^{\otimes k} + a_\lambda^K \hat{\psi}_i(a_\lambda) \quad (13)$$

Combining these,

$$\begin{aligned}\ell(\theta, (r_i(\mathbf{x}), \mathbf{y}_i)) &= h(f_\theta(\mathbf{x}_i)) - \mathbf{y}_i^\top f_\theta(\mathbf{x}_i) - a_\lambda \mathbf{y}_i^\top \Delta_i + \sum_{k=1}^K \frac{a_\lambda^k}{k!} \mathbf{J}_{h \circ f_\theta}^k(\mathbf{x}_i) \Delta_i^{\otimes k} + a_\lambda^K \hat{\psi}_i(a_\lambda) \\ &= \ell(\theta, (\mathbf{x}, \mathbf{y}_i)) - a_\lambda \mathbf{y}_i^\top \Delta_i + \sum_{k=1}^K \frac{a_\lambda^k}{k!} \mathbf{J}_{h \circ f_\theta}^k(\mathbf{x}_i) \Delta_i^{\otimes k} + a_\lambda^K \hat{\psi}_i(a_\lambda)\end{aligned}\quad (14)$$

Thus, the implicit regularization of Mixup can be unfolded as

$$\begin{aligned}L_n^{\text{mix}}(\theta, S) &= \frac{1}{n} \sum_{i=1}^n \mathbb{E}_{\lambda \sim \mathcal{D}_\lambda} \mathbb{E}_{\mathbf{x} \sim \mathcal{D}_X} \ell(\theta, (r_i(\mathbf{x}), \mathbf{y}_i)) \\ &= L_n^{\text{std}}(\theta, S) + \frac{1}{n} \sum_{i=1}^n \mathbb{E}_{\lambda \sim \mathcal{D}_\lambda} \mathbb{E}_{\mathbf{x} \sim \mathcal{D}_X} \left( \sum_{k=1}^K \frac{a_\lambda^k}{k!} \mathbf{J}_{h \circ f_\theta}^k(\mathbf{x}_i) \Delta_i^{\otimes k} - a_\lambda \mathbf{y}_i^\top \Delta_i + a_\lambda^K \hat{\psi}_i(a_\lambda) \right),\end{aligned}\quad (15)$$

where

$$\Delta_i = \sum_{k=1}^K \frac{a_\lambda^{k-1}}{k!} \mathbf{J}_{f_\theta}^k(\mathbf{x}_i) (\mathbf{x}' - \mathbf{x}_i)^{\otimes k} + a_\lambda^{K-1} \psi_i(a_\lambda).\quad (16)$$

Note that with probability 1, we have

$$\lim_{a_\lambda \rightarrow 0} \hat{\psi}_i(a_\lambda) = 0, \quad \lim_{a_\lambda \rightarrow 0} \psi_i(a_\lambda) = 0$$

□

## C PROOF OF THEOREM 2

The Rademacher generalization bound is widely applied where the empirical Rademacher complexity of a function class  $\Theta$  is given by:

$$\mathcal{R}_n(\Theta, \{\mathbf{x}_i\}_{i \in [n]}) = \mathbb{E} \left[ \sup_{\theta \in \Theta} \frac{1}{n} \sum_{i=1}^n f_\theta(\mathbf{x}_i) \epsilon_i \right]\quad (17)$$

where, Rademacher r.v  $\epsilon_i$  independently takes values in  $\{-1, +1\}$  with equal probability.

**Lemma 1.** (*Bartlett and Mendelson [2002]*). For any  $B$ -uniformly bounded and  $L$  Lipchitz function  $\zeta$ , for all  $\phi \in \Phi$ , with probability at least  $1 - \delta$ ,

$$\mathbb{E} \zeta(\phi(\mathbf{x}_i)) \leq \frac{1}{n} \sum_{i=1}^n \zeta(\phi(\mathbf{x}_i)) + 2L \mathcal{R}_n(\Phi, S) + B \sqrt{\frac{\log(1/\delta)}{2n}}$$

*Proof.* Consider GLM that  $h(f_\theta(\mathbf{x})) = A(\theta^\top \mathbf{x})$  and training set  $S$ , the constraint of  $\Theta = \{\mathbf{x} \rightarrow f_\theta(\mathbf{x}) \mid \sup_{\mathbf{x}} \hat{q}(\mathbf{x}) \leq \gamma\}$  implies that

$$\sup_{\mathbf{x}} |\hat{q}_i(\mathbf{x})| = \sup_{\mathbf{x}} (\mathbf{y} - A'(\theta^\top \mathbf{x}))^\top (\theta^\top \mathbf{x}) \leq \gamma\quad (18)$$

Rearranging the terms, and by Cauchy–Schwarz inequality we have

$$\begin{aligned}\gamma &\geq \sup_{\mathbf{x}} (\mathbf{y} - A'(\theta^\top \mathbf{x}))^\top (\theta^\top \mathbf{x}) \\ &= \sup_{\mathbf{x}} \langle \mathbf{y}, \theta^\top \mathbf{x} \rangle - \sup_{\mathbf{x}} \langle A'(\theta^\top \mathbf{x}), \theta^\top \mathbf{x} \rangle \\ &\geq \sup_{\mathbf{x}} \langle \mathbf{y}, \theta^\top \mathbf{x} \rangle - \sup_{\mathbf{x}} \|A'(\theta^\top \mathbf{x})\|_2 \|\theta^\top \mathbf{x}\|_2\end{aligned}\quad (19)$$

Due to the fact that  $A(\cdot)$  is a  $L_A$  Lipchitz function, then it's trivial to prove

$$\|A'(\theta^\top \mathbf{x})\|_2 \leq L_A\quad (20)$$

Let  $\mathbf{y} = (\theta^*)^\top \mathbf{x} = (\Sigma\theta)^\top \mathbf{x}$  where  $\Sigma$  is the diagonal matrix. Thus the above relation will be

$$\begin{aligned}\gamma &\geq \sup_{\mathbf{x}} \langle \mathbf{y}, \theta^\top \mathbf{x} \rangle - \sup_{\mathbf{x}} \|A'(\theta^\top \mathbf{x})\|_2 \|\theta^\top \mathbf{x}\|_2 \\ &\geq \sup_{\mathbf{x}} \langle (\Sigma\theta)^\top \mathbf{x}, \theta^\top \mathbf{x} \rangle - L_A \sup_{\mathbf{x}} \|\theta^\top \mathbf{x}\|_2\end{aligned}\quad (21)$$

Let  $\mathbf{v} = \sup_{\mathbf{x}} \theta^\top \mathbf{x}$  and  $\bar{\sigma}$  be the expected value that  $\bar{\sigma} = \mathbb{E}_{j \in [d]} \sup_{\mathbf{x}_i} \Sigma_i(j) = \sup_{\mathbf{x}} \frac{\text{tr}(\Sigma)}{d}$ , then we have

$$\gamma \geq \bar{\sigma} \|\mathbf{v}\|_2^2 - L_A \|\mathbf{v}\|_2 \quad (22)$$

which implies

$$\frac{L_A - \sqrt{L_A^2 + 4\gamma\bar{\sigma}}}{2\bar{\sigma}} \leq \|\mathbf{v}\|_2 \leq \frac{L_A + \sqrt{L_A^2 + 4\gamma\bar{\sigma}}}{2\bar{\sigma}} \quad (23)$$

Obviously,

$$\left| \frac{L_A + \sqrt{L_A^2 + 4\gamma\bar{\sigma}}}{2\bar{\sigma}} \right| > \left| \frac{L_A + \sqrt{L_A^2 - 4\gamma\bar{\sigma}}}{2\bar{\sigma}} \right| \quad (24)$$

Denote  $\mathbf{v}_i = \theta^\top \mathbf{x}_i$ , we have the Rademacher complexity  $\mathcal{R}(\Theta, S)$  that

$$\begin{aligned}\mathcal{R}(\Theta, S) &= \mathbb{E}_\epsilon \sup_{\mathbb{E}_{\mathbf{x}} \hat{q}(\mathbf{x}) \leq \gamma} \frac{1}{n} \sum_{i=1}^n \epsilon_i \theta^\top \mathbf{x}_i \\ &\leq \mathbb{E}_\epsilon \sup_{\|\mathbf{v}_i\|_2 \leq \left( \frac{L_A + \sqrt{L_A^2 + 4\gamma\bar{\sigma}}}{2\bar{\sigma}} \right)^2} \frac{1}{n} \sum_{i=1}^n \epsilon_i \mathbf{v}_i \\ &\leq \frac{1}{n} \cdot \frac{L_A + \sqrt{L_A^2 + 4\gamma\bar{\sigma}}}{2\bar{\sigma}} \cdot \sqrt{\mathbb{E}_\epsilon \left( \sum_{i=1}^n \epsilon_i \right)^2} \\ &= \frac{1}{\sqrt{n}} \frac{L_A + \sqrt{L_A^2 + 4\gamma\bar{\sigma}}}{2\bar{\sigma}} \\ &\leq \frac{1}{\sqrt{n}} \frac{2L_A + 2\sqrt{\gamma\bar{\sigma}}}{2\bar{\sigma}} \\ &= \frac{L_A + \sqrt{\gamma\bar{\sigma}}}{\bar{\sigma}\sqrt{n}}\end{aligned}\quad (25)$$

Consequently, we have

$$\mathcal{R}(\Theta, S) \leq \frac{L_A + \sqrt{\gamma\bar{\sigma}}}{\bar{\sigma}\sqrt{n}} \quad (26)$$

Recall the objective of *MixupE*,

$$\mathcal{L}(\theta, S) := \hat{\eta} (L_n^{mix}(\theta, S) + \eta R(\theta, S)) \quad (27)$$

$$\hat{\eta} = \frac{|L_n^{mix}(\theta, S)|}{|L_n^{mix}(\theta, S) + \eta R(\theta, S)|} \quad (28)$$

With Lemma 1, we can get

$$\begin{aligned}\mathcal{L}(\theta, S) &\leq \hat{\eta} L_n^{mix}(\theta, S) + 2\hat{\eta}\eta L\mathcal{R}(\Theta, S) + B\sqrt{\frac{\log(1/\delta)}{2n}} \\ &\leq \hat{\eta} L_n^{mix}(\theta, S) + \frac{2\hat{\eta}\eta L L_A (L_A + \sqrt{\gamma\bar{\sigma}})}{\bar{\sigma}\sqrt{n}} + B\sqrt{\frac{\log(1/\delta)}{2n}}\end{aligned}\quad (29)$$

□

## C.1 COMPARISON TO VANILLA MIXUP

As a comparison, for vanilla Mixup with parameter space  $\hat{\Theta} = \{\theta \mid \|\theta\|_2^2 \leq \gamma\}$  and assume  $\|\mathbf{x}_i\|^2 \leq \mathcal{X}, \forall i \in [n]$  the Rademacher complexity will be

$$\begin{aligned}
 \mathcal{R}(\hat{\Theta}, S) &= \mathbb{E}_\epsilon \sup_{\|\theta\|_2^2 \leq \gamma} \frac{1}{n} \sum_{i=1}^n \epsilon_i \theta^\top \mathbf{x}_i \\
 &= \frac{1}{n} \mathbb{E}_\epsilon \sup_{\|\theta\|_2^2 \leq \gamma} \sqrt{\sum_{i=1}^n \epsilon_i^2 \|\theta\|^2 \|\mathbf{x}_i\|^2} \\
 &= \frac{\sqrt{\gamma}}{n} \mathbb{E}_\epsilon \sqrt{\sum_{i=1}^n \epsilon_i^2 \|\mathbf{x}_i\|^2} \\
 &\leq \frac{\sqrt{\gamma \mathcal{X}}}{\sqrt{n}}
 \end{aligned} \tag{30}$$

Compared to the Rademacher complexity of Mixup, we found that *MixupE* don't need to bound the norm of input data by  $\mathcal{X}$  which may cause a large term. However, if considering normalized input space where  $\mathcal{X} \leq 1$ , the condition to have a shrink parameter space is

$$\frac{L_A + \sqrt{\gamma \bar{\sigma}}}{\bar{\sigma}} \leq \sqrt{\gamma} \Rightarrow \frac{L_A}{\bar{\sigma} - \sqrt{\bar{\sigma}}} \leq \sqrt{\gamma} \text{ and } \bar{\sigma} > 1 \tag{31}$$

Thus, when the above condition is satisfied, our regularization reduces the norm of parameter space for the case where input space is normalized  $\mathcal{X} \leq 1$ . In general, the  $\bar{\sigma}$  is the average entry value of the maximum correction matrix to the ground truth which can be quite large. Scaling by  $\sigma$ , it is probably satisfied in most cases.

## D IMPLEMENTATION

The code implementation in PyTorch is shown as Listing 1.

```

def beta_mean(alpha , beta):
    return alpha / (alpha + beta)

lam_mod_mean = beta_mean(alpha+1, alpha) # mean of beta distribution

# y1, y2 should be one-hot vectors
for (x1, y1), (x2, y2) in zip(loader1, loader2):
    lam = numpy.random.beta(alpha, alpha)
    x = Variable(lam * x1 + (1. - lam) * x2)
    y = Variable(lam * y1 + (1. - lam) * y2)
    loss = loss_function(net(x), y) # mixup loss
    loss_scale = torch.abs(loss.detach()).data.clone()
    f = net(x1)
    b = y1 - torch.softmax(f, dim=1)
    loss_new = torch.sum(f * b, dim=1)
    loss_new = (1.0 - lam_mod_mean) * torch.sum(torch.abs(loss_new)) / batch_size #
    additional loss term
    loss = loss + (mixup_eta * loss_new) # total loss
    loss_new_scale = torch.abs(loss.detach()).data.clone()
    loss = (loss_scale / loss_new_scale) * loss # loss after scaling
    optimizer.zero_grad()
    loss.backward()
    optimizer.step()

```

Listing 1: One epoch *MixupE* training in PyTorch

## References

- Peter L Bartlett and Shahar Mendelson. Rademacher and gaussian complexities: Risk bounds and structural results. *Journal of Machine Learning Research*, 3(Nov):463–482, 2002.
- Linjun Zhang, Zhun Deng, and Kenji Kawaguchi. How does mixup help with robustness and generalization? In *International Conference on Learning Representations (ICLR)*, 2021.
